# Supplementary material for: Decidual NK cells regulate key developmental processes at the human fetal-maternal interface
Source: Springer Nature journal article supplement (doi:10.1038/nm1452), 2006-08-06
Supplement: 41591_2006_BFnm1452_MOESM1_ESM.pdf [file 41591_2006_BFnm1452_MOESM1_ESM.pdf]

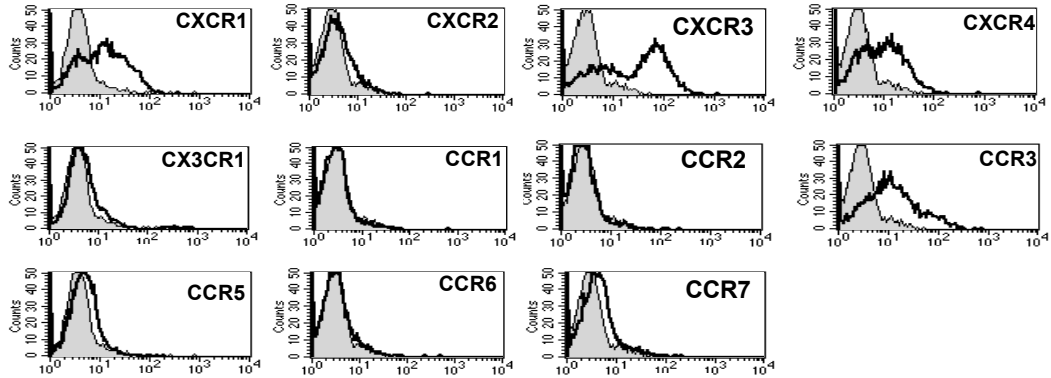

**Supplementary Figure 1. Chemokine receptor expression on human invasive trophoblasts.** Chemokine receptor analysis on single cell cytotrophoblasts that were cultured in vitro on Matrigel for 5 days and were isolated afterwards for FACS analysis as described in Methods.
