# Supplementary material for: Decidual NK cells regulate key developmental processes at the human fetal-maternal interface
Source: Springer Nature journal article supplement (doi:10.1038/nm1452), 2006-08-06
Supplement: 41591_2006_BFnm1452_MOESM2_ESM.pdf [file 41591_2006_BFnm1452_MOESM2_ESM.pdf]

(a) LIR1 -, KIR2DL1-, KIR2DS4 + dNK clone

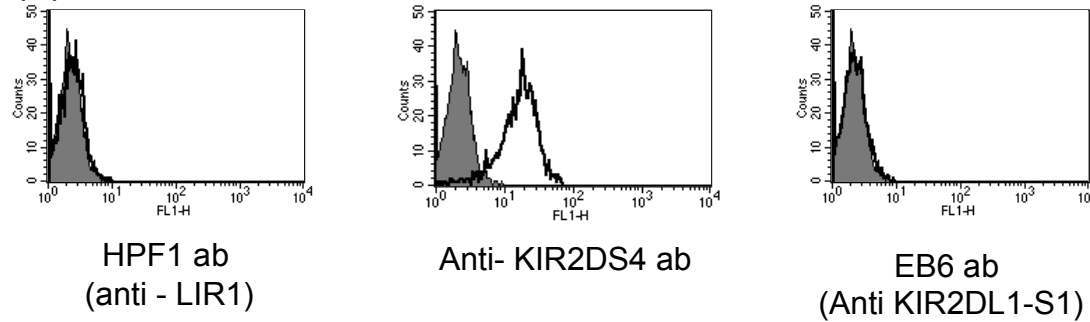

(b) LIR1 -, KIR2DL1+, KIR2DS4- dNK clone

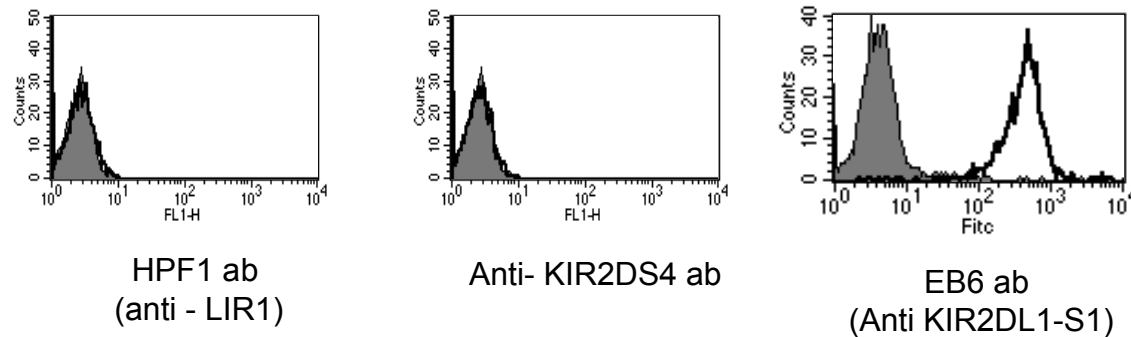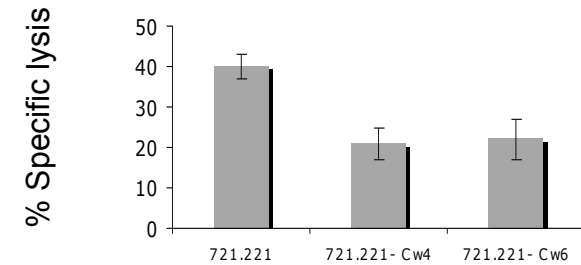

(c) LIR1 +, KIR2DL1-, KIR2DS4 - dNK clone

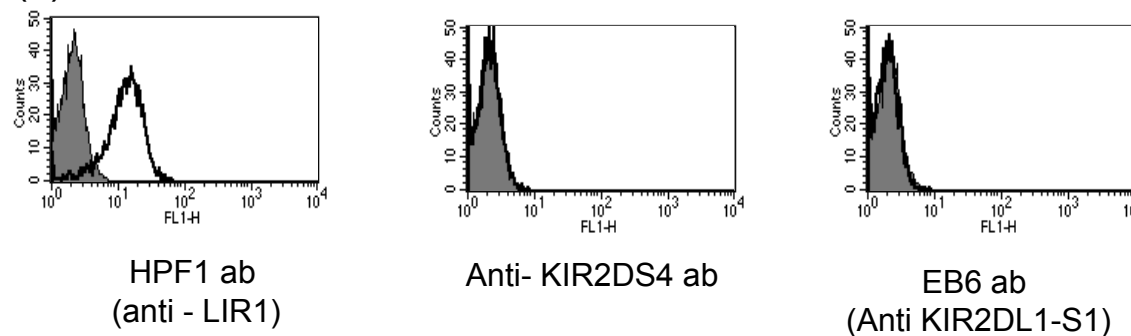

**Supplementary Figure 2. Characterization of dNK clones for LIR and KIR expression.**

Analysis of the representative IL-2 activated dNK clones used in Figure 5 is presented. LIR1 expression was directly detected by HPF1 mAb. KIR2DS4 receptor was detected by a specific mAb obtained from RnD systems, clone 179315. Expression of KIR2DL1 was determined based on 2 conditions:

1) staining with EB6 antibody (detects inhibitory KIR2DL1 and activating KIR2DS) AND 2) Inhibition of killing after recognizing CW4 and Cw6 transfectants (which inhibit KIR2DL1 but activate KIR2DS1). Regarding clone in (b), we cannot rule out that there is expression of KIR2DS1 receptor on this NK clone, however since the clone was inhibited by killing of CW4 and CW6 transfectants, we can make the conclusion that KIR2DL1 Inhibitory signaling was dominant over KIR2DS1 stimulating signaling in this clone.
