# Supplementary material for: Decidual NK cells regulate key developmental processes at the human fetal-maternal interface
Source: Springer Nature journal article supplement (doi:10.1038/nm1452), 2006-08-06
Supplement: 41591_2006_BFnm1452_MOESM4_ESM.pdf [file 41591_2006_BFnm1452_MOESM4_ESM.pdf]

**Supplementary Table 2.** Transcription profile of selected chemokines and angiogenic factors in dNK cells revealed by microarray analysis.

| Gene Family           | Gene Name                                     | Accession number | Hybridization Intensity |
|-----------------------|-----------------------------------------------|------------------|-------------------------|
| Immune cell receptors |                                               |                  |                         |
|                       | CD56 (NCAM)                                   | S71824           | 363                     |
|                       | NKp44                                         | NM_004828        | 131                     |
|                       | NKp46                                         | NM_004829        | 121                     |
|                       | CD16                                          | NM_000569        | 20                      |
|                       | CD4                                           | NM_000616        | 20                      |
|                       | CD14                                          | NM_000591        | 20                      |
|                       | CD22                                          | NM_001771        | 20                      |
| Chemokines            |                                               |                  |                         |
|                       | IL-8 (CXCL1)                                  | NM_000584        | 94                      |
|                       | SDF1a (CXCL12)                                | NM_000609        | 20                      |
|                       | IP-10 (CXCL10)                                | NM_001565        | 147                     |
|                       | RANTES (CCL5)                                 | NM_002985        | 1154                    |
|                       | Lymphctactin                                  | NM_002995        | 56                      |
|                       | MDC (CCL22)                                   | NM_002990        | 316                     |
| Angiogenic factors    |                                               |                  |                         |
|                       | Placental growth factor (PLGF)                | NM_002632        | 2155                    |
|                       | Vascular Endothelial Growth Factor A (VEGF-A) | AF022375         | 135                     |
|                       | Vascular Endothelial Growth Factor B (VEGF-B) | NM_003377        | 91                      |
|                       | Vascular Endothelial Growth Factor C (VEGF-C) | NM_005429        | 120                     |
|                       | VEGF Related Factor (VRF)                     | U43368           | 307                     |
|                       | NKG5                                          | M85276           | 3291                    |
|                       | Angiopoetin 2                                 | NM_001147        | 46                      |
|                       | Epidermal Growth Factor (EGF)                 | NM_001963        | 96                      |
|                       | Leptin                                        | NM_000230        | 100                     |

For each gene the following information is supplied: gene description, accession number and the average hybridization intensity value. Analysis performed on gene-array data following normalization, yielded negative intensity detection

values for transcripts known to be specific for monocytes, B or T cells (CD14, CD22 and CD4) and significant detection values for dNK cell markers CD56, NKp44 and NKp46, thus emphasizing the purity of the cells obtained by our isolation method and validity of this experiment.
