# Supplementary material for: Decidual NK cells regulate key developmental processes at the human fetal-maternal interface
Source: Springer Nature journal article supplement (doi:10.1038/nm1452), 2006-08-06
Supplement: 41591_2006_BFnm1452_MOESM5_ESM.pdf [file 41591_2006_BFnm1452_MOESM5_ESM.pdf]

**Supplementary Table 3. Semiquantitative RT-PCR analysis of chemokines in human dNK cells.**

Semi-quantitative RT-PCR analysis was performed on mRNA isolated from dNK cells for several chemokines. .

'+' indicates detection of transcription, '-' indicates that no transcription was detected. Hybridization intensity values obtained from the gene-array analysis are indicated. Semi-quantitative RT-PCR analysis for the transcription for all known human chemokines expressed by dNK cells resulted in a complete correlation between the chemokine expression pattern obtained from the gene array analysis and the RT-PCR results.

| Chemokine | Chemokine   | Sense Primer              | Antisense Primer       | Product (bp) | RT-PCR | Gene Array Hybridization Intensity |
|-----------|-------------|---------------------------|------------------------|--------------|--------|------------------------------------|
| CCL1      | I-309       | ATGCAGATCATCACCACAGC      | ATCCAACGTGTCCAAGGCG    | 238          | -      | 20                                 |
| CCL2      | MCP-1       | ATGAAAGTCTCTGCCGCCCT      | ACAGATCTCCTTGCCACAA    | 225          | -      | Not available                      |
| CCL3      | MIP-1a      | ACTGCAGGTCTCCACTGCTG      | CTGCCGGCTTCGCTTGGTTA   | 214          | +      | 47                                 |
| CCL4      | MIP-1b      | ATGAAGCTCTGCGTACTGT       | CTTGCTTCTTTGGTTTGGGA   | 213          | +      | 46                                 |
| CCL5      | RANTES      | CACGCCTCGCTGTCATCCTCAT    | TGGCACACACTTGCCGGTTC   | 207          | +      | 1154                               |
| CCL7      | MCP-3       | TGTGGAAGCCCATGCCCT        | TGGGGTCAGCACAGATCTCC   | 264          | -      | 20                                 |
| CCL8      | MCP-2       | ATGCTGAAGCTCACACCCTT      | TCAGCACAGACCTCCTTGCC   | 260          | -      | 20                                 |
| CCL11     | EOTAXIN-1   | ATGAAGGTCTCCGCAGCACT      | AGCAGCAGGTGGTTGGGA     | 100          | -      | 20                                 |
| CCL13     | MCP-4       | CTTCAACATGAAAGTCTCTG      | ACAGATCTCCTTGCCAGTT    | 229          | -      | 20                                 |
| CCL14     | HCC-1       | GGCTGCCATTCCCTTCTTC       | ACAGACGGAATGGCCCT      | 211          | -      | 20                                 |
| CCL15     | MIP-5       | TGCCTTCTCCTGCCTCATGCTT    | TTTGGCACAGACTTGCCGCC   | 268          | +      | Not available                      |
| CCL16     | LEC         | ATGAAGGTCTCCGAGGCTGC      | GGCAAAGGTAGGTTGGGAT    | 287          | -      | 24                                 |
| CCL17     | TARC        | ATGGCCCCACTGAAGATGCT      | TTGGGGTCCGAACAGATGGC   | 230          | -      | 20                                 |
| CCL19     | ELC         | TACTGGCCCTCAGCCTGCTGGTTCT | CGGCGCTTCATCTTGGCTGA   | 272          | -      | 20                                 |
| CCL20     | LARC        | ATGTGCTGTACCAAGAGTTT      | CAAGTCTGTTTTCGATTTGC   | 242          | -      | 20                                 |
| CCL21     | SLC         | ATGGCTCAGTCACTGGCTCT      | CCTTTCTTGCCAGTCTTGGGA  | 347          | -      | 20                                 |
| CCL22     | MDC         | ATGGCTCGCTACAGACTGC       | TGAAGGTTAGCAACACCAC    | 211          | +      | 316                                |
| CCL24     | EOTAXIN-2   | TGGCAGGCCTGATGACCAT       | GGCGTCCAGGTTCTTCATGT   | 272          | -      | 20                                 |
| CCL25     | TECK        | ATGAACCTGTGGCTCCTGGC      | TTTACAGCATGAGGGCCTG    | 344          | +      | 45                                 |
| CCL26     | EOTAXIN-3   | CTCTCCTTGGCCTCTGCTGT      | TGGGAGCAGCTGTTACTGGT   | 167          | -      | 20                                 |
| CXCL1     | GROa        | ACTGCTGCTCCTGCTCCTGGTA    | GATTGAGGCAAGCTTTCCG    | 206          | +      | 48                                 |
| CXCL2     | GROb        | CACTGAACCTGCGCTGCCAGT     | CTGCCATTCTTGAGTGTGG    | 133          | +      | 74                                 |
| CXCL3     | GROg        | AGCGTCCGTGGTCACTGAACT     | ACTTCGGTTTGGGCGCAGTG   | 120          | +      | 34                                 |
| CXCL4     | PF4         | GAGCCTCAGACTTGATACCACC    | CGGAGTTCAGCATACAAGTCAC | 185          | -      | 20                                 |
| CXCL5     | ENA-78      | CGGTCCTTCGAGCTCCTTGT      | GGGCTATGGCGAACACTTG    | 185          | +      | 38                                 |
| CXCL6     | GCP-2       | GGTCTGTCTCTGCTGTGCT       | ACTTCCACCTTGAGACTG     | 128          | -      | 20                                 |
| CXCL7     | NAP-2       | ATGAGCCTCAGACTTGATAC      | GTGGCTATCACTTCGACTTG   | 290          | -      | 20                                 |
| CXCL8     | IL-8        | TGACTTCCAAGCTGGCCGT       | GGATGTTTGTACCAAAGCATC  | 159          | +      | 94                                 |
| CXCL9     | MIG         | AAGTGGTGTCTTTTCTCT        | TTTCTTTTGGCTGACCTGT    | 283          | +      | 34                                 |
| CXCL10    | IP-10       | CCATGAATCAAACCTGCGATT     | TCAGACATCTCTTCTCACCC   | 228          | +      | 147                                |
| CXCL11    | I-TAC       | ATGAGTGTGAAGGGCATGG       | GGATTTAGGCATCGTTGTCC   | 230          | +      | 39                                 |
| CXCL12a   | SDF1-a      | ATGAACGCCAAGGTCGTGGTCG    | TGTTGTTGTTCTTCAAGCCG   | 202          | -      | 20                                 |
| CXCL12b   | SDF1-b      | ATGAACGCCAAGGTCGTGGTCG    | CGGGTCAATGCACACTTGTG   | 220          | -      | Not available                      |
| CXCL13    | BLC         | ATGAAGTTCATCTCGACATC      | GTATCCATTCAGCTTGA      | 253          | -      | 20                                 |
| CXCL14    | BRAK        | CAAGATCCGCTACAGCGACGTG    | TGAAGCGCTTGGTCTCTG     | 157          | -      | 20                                 |
| XLCL1     | LYMPHTACTIN | CCTCCTTGGCATCTGCTCT       | GCTTGTGGATCAGCACAGACT  | 203          | +      | 56                                 |
| CX3CL1    | FRACTALKINE | TATCTCTGTCTGGCTGCTC       | GATGCCTGGTTCTGTTGATA   | 167          | -      | 21                                 |
