# Supplementary material for: Decidual NK cells regulate key developmental processes at the human fetal-maternal interface
Source: Springer Nature journal article supplement (doi:10.1038/nm1452), 2006-08-06
Supplement: 41591_2006_BFnm1452_MOESM6_ESM.pdf [file 41591_2006_BFnm1452_MOESM6_ESM.pdf]

Decidual Trophoblasts

|        |   |
|--------|---|
| CXCR1  | + |
| CXCR2  | - |
| CXCR3  | + |
| CXCR4  | + |
| CXCR5  | - |
| CXCR6  | - |
| CCR1   | - |
| CCR2   | + |
| CCR3   | + |
| CCR4   | - |
| CCR5   | + |
| CCR6   | - |
| CCR7   | + |
| CCR8   | - |
| CCR9   | - |
| CCR10  | - |
| CX3CR1 | - |
| XCR1   | - |
| HLA-G  | + |
| HLA-C  | + |
| HLA-B  | - |

**Supplementary Table 4. Chemokine receptor transcription on HLA-G+ purified human invasive decidual trophoblasts.**

Semi-quantitative RT-PCR analysis was performed on mRNA isolated from sorted HLA-G+ invasive trophoblasts.

'+' indicates detection of transcription, '-' indicates that no transcription was detected. The presence of HLA-G and HLA-C transcription, and lack of HLA-B were used as positive and negative controls. Respectively. Chemokine receptor primers were previously described in *Blood*. 2003 Sep 1;102(5):1569-77. Pan HLA-B and HLA-C primers were previously described *The Journal of Immunology*, 1996, 156:2068-2076. HLA-G primers: 5' sense:ttggaagaggagacacggaacac 3'antisense: ctccttggcagccacattggcc
