# Supplementary material for: Decidual NK cells regulate key developmental processes at the human fetal-maternal interface
Source: Springer Nature journal article supplement (doi:10.1038/nm1452), 2006-08-06
Supplement: 41591_2006_BFnm1452_MOESM7_ESM.pdf [file 41591_2006_BFnm1452_MOESM7_ESM.pdf]

## Supplementary Methods

### **Decidual NK Cells Regulate Key Developmental Processes at the Human Fetal-Maternal Interface**

Hanna et al.

**Isolation of human NK subsets.** The institutional board of Hadassah organization approved the use of decidual and placental waste material from more than 550 elective pregnancy termination procedures, according to the principles of the Helsinki Declaration. In this study, lymphocytes from parts of decidua basalis and parietalis as previously described<sup>1</sup>. CD56<sup>bright</sup>CD16<sup>-</sup>CD3<sup>-</sup> dNK cells were purified afterwards as described below. Peripheral blood lymphocytes were isolated from different healthy donors using Ficoll gradients. Isolation of NK cells was performed by using NK isolation kit II (Miltenyi Biotec), according to manufacturer's instructions.  $100 \times 10^6$  cells enriched for CD56<sup>+</sup>CD3<sup>-</sup>NK cells from each donor were subsequently sorted as described below in order to purify CD56<sup>dim</sup>CD16<sup>+</sup>CD3<sup>-</sup> and CD56<sup>bright</sup>CD16<sup>-</sup>CD3<sup>-</sup> subsets. For each experimental with NK subsets, we also performed mock isolation of pbNK cells as if they were dNK cells to rule out the possibility that differences between NK subsets was due to methodological differences in isolation procedures. This was achieved by subjecting isolated pbNK cells to the same isolation protocol used for the isolation of dNK cells<sup>2</sup>.

**Flow cytometry based NK cell sorting and staining.** The following mouse anti-human mAbs conjugated with FITC, PE, APC or Cychrome were used for cell sorting: anti-CD56, anti-CD16, anti-CD3 (all obtained from BD biosciences) and

matching conjugated isotype controls. For staining and cell sorting, cells were washed in PBS supplemented with 2% FCS and incubated with mAb on ice for 30 min, followed by washing twice. Cell sorting and fluorescence measurements were performed on a MoFlo high performance cell sorter (DakoCytomation). Data from single cell events were collected using a standard FACScalibur™ flow cytometer (Immunocytometry systems; Beckton Dickinson). Peripheral blood NK subsets were highly purified to obtain 2 subsets: CD56<sup>dim</sup>CD16+CD3- NK (pbCD16+ NK) and CD56<sup>bright</sup>CD16-CD3- (pbCD16- NK). Decidual NK cells were uniformly of the CD56<sup>bright</sup>CD16-CD3- phenotype (dNK) cells. Subset purity was routinely checked to be higher than 99% (figure 1). Intracellular staining was performed with Cytoperm-Cytofix Intracellular Staining kit (Pharmingen) according to the manufacturer's instructions. Mouse anti-human mAbs against IL-8 (mouse IgG1 clone 6217), IP-10 (Mouse IgG1 clone 33036), VEGF (mouse IgG2a clone 23410 – recognizes all isoforms of VEGF), PLGF (mouse IgG1 clone 37203.111), SDF1 (mouse IgG1 clone 79014) and matching isotype controls (all obtained from RnD systems) were used for intracellular staining.

**Microarray analysis of highly purified human dNK cells.** Microarray analysis was performed on highly purified CD56<sup>bright</sup>CD16- decidual NK (dNK) cells pooled from 23 health elective 1st trimester elective terminations (6-10 weeks). Subsequently, each purified subset from all donors was pooled and used to obtain a total RNA extract. We confirmed that the cRNA samples were fragmented to uniform size by using Agilent Bioanalyzer before continuing with sample labeling and hybridization procedures. Gene expression profiling was performed on dNK subset by using CodeLink™ Uniset Human 20K I Bioarray. The labeled cRNA samples were hybridized in duplicate to enhance the significance of the hybridization intensities and to eliminate random noise especially from probe sets at the borderline of expression. The

global normalization (total intensity normalization) method was used for the data obtained from the Amersham array. The mean intensities were calculated for each array ( $M_i, i = 1, 2, \dots, n$ ) and used to calculate the mean intensity across the arrays ( $M_a$ ). The scale factors ( $F_i, i = 1, 2, \dots, n$ ) were calculated for each array as  $M_a/M_i$ . The normalized intensities for each array were calculated by multiplying scale factors by their measured intensities. This classical normalization method scales the individual intensities so that the mean intensities are the same across all arrays, and were applied to the data by an in-house developed program. Additionally, 20 was set to be the minimal normalized hybridization intensity value (in other words, all intensities below 20 were brought up to this value) after observing that a set of more than 10 transcripts (e.g., CD20, CD4, CTLA4, etc.), known to be absent in NK cells and/or in human cells, showed hybridization intensity values below this threshold. We averaged normalized hybridization intensity values for dNK sample replicate experiments, and used these values for estimating gene expression patterns. We defined positive transcription detection for genes that yielded hybridization intensities higher than 2 fold above the minimal threshold of 20 (values over 40). The microarray data is deposited at NCBI's Gene Expression Omnibus (GEO) under entry names: GSM26206-26207.

### **Preparation and culture of cytotrophoblasts**

Single cell cytotrophoblast cultures were established from pooled first trimester human placentas (8-10 weeks of gestation). First trimester placental cells from elective pregnancy terminations were studied in accordance with the protocol for the study of human subjects approved by our institutional review board. Cytotrophoblasts were isolated and purified as previously described<sup>3</sup> with some modifications. Placental tissue was placed in ice-cold saline and processed within the hour. Briefly, the placental tissue was rinsed with PBS (phosphate buffered saline) and the soft villous material was cut away from connective tissue and vessels. The villous tissue was incubated for 30 minutes at 37 C in HBSS (Hank's balanced salt solution) containing

0.125% trypsin type XII-S (Sigma, St. Louis, MO), 3 mM EDTA and 0.2 mg/ml deoxyribonuclease I (Sigma, St. Louis, MO, USA). The dissociated cells were isolated by centrifugation, resuspended in medium and layered over a discontinuous Percoll (Pharmacia, Sweden) gradient (15% to 70%) prepared in HBSS. The middle bands of the gradient (35%-55%), containing the cytotrophoblasts were collected and washed several times with culture media (DMEM: F12(HAM) - 1:1 ) and 15% heat-inactivated FCS. The remaining leukocytes were removed as previously described <sup>3</sup>. Cell cultures were maintained in culture media at 37C and 5%CO<sub>2</sub> in a humidified incubator. All tissue culture supplies were purchased from Biological Industries Inc. (Beit-Haemek, Israel) unless otherwise specified. Afterwards trophoblasts were plated on 24 well plates precoated with 75% growth factor reduced Matrigel (BD Biosciences, Bedford, MA) and incubated in media as described above. After 5 days trophoblasts were removed by scraping the plates and treatment with trypsin-EDTA and used for analysis. Extra-villous trophoblasts were obtained from decidual samples that were trimmed into 1mm pieces and enzymatically digested for 20 minutes by shaking in 37C, with 1.5 mg type I DNase and 24 mg type IV collagenase (Sigma) present in 15 ml of RPMI-1640 medium. This procedure was repeated three times. The supernatants were collected, centrifuged and the cells were incubated overnight in tissue culture dishes in DMEM medium with supplements. Non adherent cells were removed, and the remaining adherent cells were removed with a short treatment with trypsin-EDTA. Sorting of purified HLA-G+ extra-villous trophoblasts from the adherent decidual fraction was performed with a monoclonal mouse anti-human HLA-G specific antibodies (mouse IgG1 MEM-G/09 and MEM-G/13B clones all produced and kindly provided by Dr. Horejsi, Prague, Czech Republic) <sup>4</sup>. Intracellular staining on purified trophoblasts was performed with Cytofix-cytoperm kit (Pharmingen) and with mouse anti-human Cytokeratin 7 (mouse IgG1 clone OV-TL 12/30) and mouse anti-human vimentin (mouse IgG2a clone Vim 3B4) and matching isotype controls (all obtained from DakoCytomation, Glostrup, Denmark).

**Immunohistochemistry analysis.** Immunohistochemistry for chemokine receptors CXCR1, CXCR3 and CXCR4 was performed on first trimester human placental paraffin-embedded sections as previously described <sup>5</sup>, with microwave antigen retrieval using sodium citrate buffer (Zymed Laboratory Inc, San- Francisco, CA, USA). Primary monoclonal mouse anti human antibodies were used (all obtained from R&D Systems, Inc. MN. USA): anti-human CXCR3 antibody (IgG1, clone49801, staining concentration of 10 micrograms/ml), anti-human CXCR1 mAb (IgG2A, clone 42705, staining concentration of 10 micrograms/ml), anti-human CXCR4 (IgG2A, clone 44708, staining concentration 10 micrograms/ml). Staining with same concentration of isotype match controls for each chemokine receptor were used on same serial sections as controls. The mouse anti human mAb for HLA-G was previously described and kindly provided by Dr. Mike McMaster (mouse IgM)<sup>4</sup>. Immunohistochemistry on decidual sections with NCR-Fc fusion proteins (prepared as previously described <sup>6</sup>) was performed by microwave heating of the formalin-fixed, paraffin embedded tissue sections in citrate buffer in order to retrieve antigens. Sections were then stained with the different NCR-Fc fusion proteins or control-Fc (8 µg/ml, final concentration) followed by biotinylated-goat-anti-human-Fc (Jackson ImmunoResearch, West Grove, PA). For detection, the avidin-biotin peroxidase complex method was employed with Vectastain kit (Vector Laboratories, Burlingame, CA).

**Transwell in vitro migration assays.**  $150 \times 10^3$  isolated human trophoblasts were placed in the upper chamber of 8 micron Transwells, (Costar Inc) on 100µl of solid growth factor reduced Matrigel (BD Biosciences, Bedford, MA). Different NK cell subsets ( $100 \times 10^3$  cells in 600 µl of Bio-MPM-1 medium (Biological Industries,

Beit Haemek, Israel) supplemented with 5 U/ml of IL-15 and 5% pen-strep and non-essential amino acids) were placed in the lower chamber for five days. When neutralizing antibodies for chemokines were used, they were added to the lower chambers (anti-IL-8, anti-IP-10, anti-SDF1 and anti-Eotaxin mAbs; all from RnD systems) at a concentration of 5µg/ml each. NK subset ability to induce HUVECs migration was performed by placing NK derived supernatants or control media in the lower chamber of Transwell inserts with 6.5µm pores. HUVECs ( $5 \times 10^4$ ) were plated in the upper chamber, and allowed to migrate for 4 hours at 37°C. At the end of the trophoblast or HUVEC migration assays, the filter side of upper chamber was gently cleansed with a cotton swab and the filter was stained for one hour with crystal violet (Sigma) in 2% ethanol and then rinsed in water. The filter was gently cut from the chamber and the cells that had migrated through the filter pores were counted from the underside of the filter. The number of cells that migrated across the filters was counted in 4 high-power fields per insert, and values were averaged afterwards. For each migration conditions, three identical replicates were performed.

**Invasion of trophoblasts into Matrigel plugs in vivo.** We embedded different NK subset (purified dNK and pbNK subpopulations) in a growth factor reduced collagen gel – Matrigel (BD Biosciences, Bedford, MA).  $150 \times 10^3$  NK cells (dNK, pbCD16+ and pbCD16- NK) were incubated in 200 µl of BIO-MPM-1 medium supplemented with 5 U/ml of recombinant human IL-15 for 48 hours and put afterwards in 500µl of liquid growth factor reduced Matrigel. Subcutaneous injection of these mixtures into NUDE mice resulted in the formation of palpable plugs entrapping and supporting the growth of the cells contained in them in vivo. Afterwards, we injected  $0.75 \times 10^6$  trophoblast cells at the rim and around the palpable SC Matrigel

plug (30 minutes after initial Matrigel injection). After 6 days, Matrigel plugs were dissected, and treated with collagenase and DNase (Sigma) at 37°C for 30 minutes while they were repeatedly pipetted to break Matrigel clumps. Afterwards cells were centrifuged and treated for 2 minutes at 37°C with trypsin –EDTA to break any remaining trophoblast clumps. Ice-cold flow cytometry buffer supplemented with 2mM EDTA was used for staining of trophoblasts in order to prevent them from forming aggregates. Isolated cells from these plugs were stained with anti-HLA-G mAb to quantify the number of the invading trophoblasts by flow cytometry (based on their unique expression of this marker). The total cells from each sample were analyzed by FACS analysis, and the number of positive events above the set threshold was used as an indicator to the quantity of invading HLA-G+ trophoblasts. When neutralizing antibodies for chemokines were used, they were in the liquid Matrigel solution (anti-IL-8, anti-IP-10, anti-SDF1 and anti-Eotaxin mAbs; all from R&D systems) at a concentration of 15 µg/ml each.

**Network formation assay and migration of HUVECs.** Human umbilical vein endothelial cells (HUVECs) were prepared as previously described<sup>7</sup>. Briefly, the umbilical cord was treated with Collagenase Type II (Sigma, St. Louis, MO). Cells were grown in M-199 medium supplemented with 10% heat inactivated FBS, 8% pooled inactivated human serum, 25 µg/ml BTI Endothelial Mitogen (ECGF-Biomedical Technologies Inc., Stroughton MA) and 5 U/ml heparin (Kamada, Beit kama, Israel). Tissue culture reagents were purchased from Biological Industries LTD. (Beit Haemek, Israel). Passages 2-4 were used for the experiments. Network formation was performed by pouring ice cold growth factor reduced Matrigel into 35mm dishes and allowed to gel for 1 hour at 37°C. Thereafter, HUVECs ( $5 \times 10^4$ ) were plated on

Matrigel and incubated for 12 hours with conditioned supernatants obtained after incubation of dNK, pbCD16+ NK or pbCD16-NK cells in M199 medium containing 1% heat inactivated FCS and 5 U/ml of IL-15 for 72 hours. HUVECs were photographed microscopically to evaluate the extent of network formation after 12 hours<sup>8</sup>. Tube length was quantitatively analyzed as previously described<sup>9</sup>. Tube length values in pixels for several pictures obtained from the same experimental subgroup indicated on each frame were averaged.

**Quantification of secreted factors.** Levels of different cytokines and growth factors (IL-8, IP-10, SDF-1, VEGF, and PLGF) in supernatants were measured by ELISA using matching quantikine kits (R&D Systems).

**JEG3 transplantation assay.** Four week old NUDE mice (3 mice per group), maintained in pathogen-limited conditions, were inoculated subcutaneously in the back region below the neck with JEG3 cells ( $2.5 \times 10^6$  cells in RPMI); either alone or mixed with different NK subpopulations ( $1 \times 10^6$  in RPMI). The total injection volume was 200  $\mu$ l. To study the effects of VEGF and PLGF neutralization on tumor growth, together with cell inoculums, mice received Flt1-Fc or CTLA4-Fc used as control (50  $\mu$ g per mouse; R&D Systems Inc.). A similar amount of NK cells with or without Flt1-Fc or CTLA4-Fc molecules were re-injected subcutaneously in the same injection site on day 10 and 20 after the initial injection. At day 30 the mice were sacrificed and we determined tumor weight and size. The latter was estimated in square millimeters as the product of 2-dimensional measurements (longest perpendicular length and width). Paraffin sections were also prepared from tumor samples obtained and microscopic vascular area was determined in sections stained with anti-Von Willebrand and hematoxylin at 150X original magnifications. Captured images then were transferred



and quantified by using the National Institutes of Health image software (public domain software; available at <http://rsb.info.nih.gov/nih-image/>) according to the accompanying instructions. Blood vessels were identified based on morphological identification by a pathologist and staining of endothelial cells with anti-Von Willebrand Ab. Diameters were measured as the minimum axis of the best fit-ellipse to the lumen. 10 images from each experimental subgroup were chosen for the analysis and eventually averaged to give a representative vascular area <sup>10</sup>. All measurements were determined in a blinded way by two operators on two different occasions.

### **Stimulation of MHC class I binding receptors on dNK clones.**

In vitro culturing and generation of IL-2 dNK clones was previously described <sup>11,12</sup>. dNK clones were characterized for their expression of KIR2DS4, LIR-1 and KIR2DL1 receptors. Clones that were positive for only one of these receptors were selected for co-incubation experiments. We used anti-KIR2DS4 mAb (RnD systems), anti-LIR1 mAb (HPF1 clone, kindly provided by Dr. Miguel Lopez-Botet) and EB6 mAb directed against KIR2DL1 and KIR2DS1 (Immunotech, Westbrook, ME). Among EB6 positive clones, we selected only the clones on which functional expression of KIR2DL1 was verified by inhibition of killing Cw4 and Cw6 transfected 721.221 target cells <sup>28</sup> (Supplementary figure 2). The MHC class I negative cell line 721.221 has been previously used to generate transfectants with ligands for a number of activating and inhibitory KIR receptors (721.221-Cw4, 721.221-Cw6, 721.221-HLA-G) <sup>12,13</sup>. We performed co-culturing experiments of  $30 \times 10^3$  dNK cells per well from each clone expressing a certain characterized receptor profile with an equal amount of different irradiated 721.221 transfectant cells for 72 hours at 37°C 5% CO<sub>2</sub> in Bio-MPM-1 medium with 5% pen-strep and non-essential amino acids, followed by ELISA measurement of produced cytokines.

## Measurement of growth factor productions following crosslinking of

**NCRs on dNK cells by mAbs.** Purified NK subsets were co-cultured with P815 mouse tumor cell line coated or uncoated with 0.1µg per well of anti-NKp30, anti-NKp44, anti-NKp46, anti-NKG2D or anti-CD16 mAbs (all mAbs used were IgG1 isotype and were obtained from RnD system, Dakocytomation and SouhernBiotech). Antibodies to NK receptors were obtained from RnD systems or SouthernBiotech Inc. Cytokine secretion levels were assessed after 24 hours of incubation in BIO-MPM-1 medium with 5% pen-strep and non-essential amino acids, without any added IL-2 or IL-15 activating cytokines.

## References:

1. Markel, G. et al. Pivotal role of CEACAM1 protein in the inhibition of activated decidual lymphocyte functions. *J Clin Invest* **110**, 943-53 (2002).
2. Kopcow, H.D. et al. Human decidual NK cells form immature activating synapses and are not cytotoxic. *Proc Natl Acad Sci U S A* **102**, 15563-8 (2005).
3. Shimonovitz, S. et al. Developmental regulation of the expression of 72 and 92 kd type IV collagenases in human trophoblasts: a possible mechanism for control of trophoblast invasion. *Am J Obstet Gynecol* **171**, 832-8 (1994).
4. McMaster, M.T. et al. Human placental HLA-G expression is restricted to differentiated cytotrophoblasts. *J Immunol* **154**, 3771-8 (1995).
5. Hanna, J. et al. CXCL12 expression by invasive trophoblasts induces the specific migration of CD16- human natural killer cells. *Blood* **102**, 1569-77 (2003).
6. Arnon, T.I. et al. Inhibition of the NKp30 activating receptor by pp65 of human cytomegalovirus. *Nat Immunol* **6**, 515-23 (2005).
7. Jaffe, E.A., Nachman, R.L., Becker, C.G. & Minick, C.R. Culture of human endothelial cells derived from umbilical veins. Identification by morphologic and immunologic criteria. *J Clin Invest* **52**, 2745-56 (1973).
8. Watanabe, K. et al. Vasohibin as an endothelium-derived negative feedback regulator of angiogenesis. *J Clin Invest* **114**, 898-907 (2004).
9. Venkatesha, S. et al. Soluble endoglin contributes to the pathogenesis of preeclampsia. *Nat Med* **12**, 642-649 (2006).
10. Chang, Y.S. et al. Mosaic blood vessels in tumors: frequency of cancer cells in contact with flowing blood. *Proc Natl Acad Sci U S A* **97**, 14608-13 (2000).
11. Katz, G. et al. MHC class I-independent recognition of NK-activating receptor KIR2DS4. *J Immunol* **173**, 1819-25 (2004).

12. Katz, G., Markel, G., Mizrahi, S., Arnon, T.I. & Mandelboim, O. Recognition of HLA-Cw4 but not HLA-Cw6 by the NK cell receptor killer cell Ig-like receptor two-domain short tail number 4. *J Immunol* **166**, 7260-7 (2001).
13. Gonen-Gross, T. et al. Complexes of HLA-G protein on the cell surface are important for leukocyte Ig-like receptor-1 function. *J Immunol* **171**, 1343-51 (2003).
